# Supplementary material
Source: Springer Nature journal article supplement (https://www.springermedizin.de/resource/supplementary/13054_2011_9560_MOESM5_ESM.pdf/9706458)
Supplement: MOESM5 [file 9706458]

**a**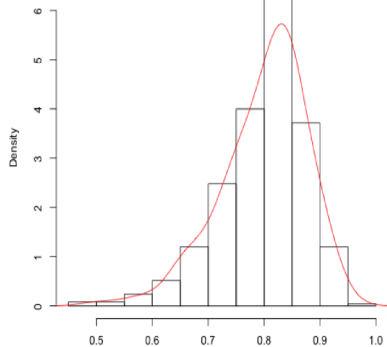

AUC PS Vs Sepsis

**b**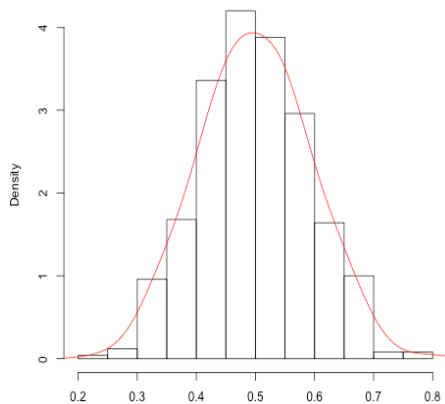

Randomised diagnosis (PS &amp; Sepsis)

**c**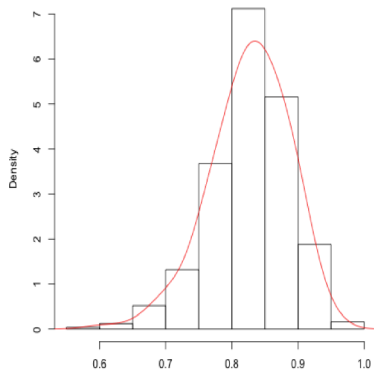

AUC PS VS Sepsis

**d**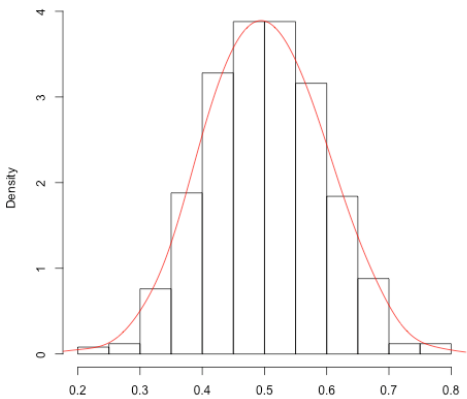

Randomised diagnosis (PS &amp; Sepsis)
